1  
2  
3  
4  
5  
6  
7  
8  
9  
10  
11  
12  
13  
14  
15  
16  
17  
18  
19  
20  
21  
22  
23  
24  
25  
26  
27  
28  
29  
30  
31  
32

## The true size of placebo analgesia:

# Concordant neural and behavioural measures of placebo analgesia during experimental acute pain

E Valentini<sup>1,2,3\*</sup>, SM Aglioti<sup>2,3</sup>, B Chakrabarti<sup>4\*</sup>

<sup>1</sup>*Department of Psychology and Centre for Brain Science, University of Essex, UK*

<sup>2</sup>*Sapienza Università di Roma, Dipartimento di Psicologia, Italy*

<sup>3</sup>*Fondazione Santa Lucia, Istituto di Ricovero e Cura a Carattere Scientifico, Italy*

<sup>4</sup>*Centre for Integrative Neuroscience and Neurodynamics, School of Psychology and Clinical Language Sciences, University of Reading, UK.*

**Running title:** psychophysical and electroencephalographic measures of placebo analgesia

### Corresponding authors:

Dr. Elia Valentini

Centre for Brain Science, Department of Psychology,

University of Essex, Wivenhoe Park, Colchester CO4 3SQ, UK

Phone: +44 1206 873733

email address: evalent@essex.ac.uk

Professor Bhisudev Chakrabarti

Centre for Integrative Neuroscience & Neurodynamics,

School of Psychology & Clinical Language Science,

University of Reading, Whiteknights, Reading RG6 6AL, UK

Phone: +44 118 378 5551

Email: b.chakrabarti@reading.ac.uk

33 **Abstract**

34 ‘Placebo analgesia’ refers to the reduction of pain following the administration of an inactive  
35 treatment. While most clinical trials compare a drug treatment against a placebo to determine the  
36 efficacy of the analgesic, most experimental studies of placebo analgesia do not include a real  
37 analgesic condition. A direct comparison of placebo against a real analgesic can inform us about the  
38 true size of the placebo effect. To this end, we aimed to provide a robust estimate of placebo  
39 analgesia by contrasting the effect of pain relief expectation from an inert cream (vaseline) against a  
40 real topical analgesic agent (lidocaine) applied on two different limbs and their respective control  
41 conditions. Pain reports and electroencephalography (EEG) responses triggered by laser nociceptive  
42 stimulation were collected. Forty typical healthy adults were enrolled in a double-blind randomized  
43 within-subject study where a standard placebo induction script of verbal suggestions in a sham  
44 medical setting was used to enhance the expectation on treatment outcome. In line with the earliest  
45 studies of placebo analgesia, majority (30 of 40) of participants was placebo responders, i.e. they  
46 reported lower pain to the placebo treatment. Placebo responders reported low pain and displayed  
47 low laser evoked potentials (LEPs) amplitude for both the analgesic and placebo treatment limbs  
48 compared to the respective control limbs. Placebo analgesia correlated positively with the amplitude  
49 of the LEPs, thus establishing convergent validity of the findings. This study provides a robust  
50 estimate of the neural and behavioural measures of placebo analgesia, in comparison to a real  
51 analgesic. These estimates can help inform the quantitative criteria for similar neural and  
52 behavioural measures in assessing the effectiveness of a real drug in placebo controlled trials.

53

54 **Key words:** Electroencephalography, laser evoked potentials, lidocaine, nociception, pain, placebo  
55 analgesia, vaseline.

56

## 57 **1. Introduction**

58 Placebo effects lead an individual to display/feel an experiential improvement following the  
59 administration of an inert treatment with no actual therapeutic properties. In other words, factors  
60 differing from the purported treatment can cause a beneficial physical response. This has been  
61 observed in several clinical conditions and diseases, particularly in clinical pain (Tuttle et al., 2015).  
62 While the phenomenon is well recognized, the magnitude of placebo effects, the influence of the  
63 context, and their temporal course are less known (see Benedetti, 2008 for a general review).

64 Despite a robust body of evidence over the last four decades starting from (Levine, Gordon, &  
65 Fields, 1978), there remain important concerns on the robustness and reliability of placebo,  
66 especially in the clinical settings. Meta-analytic studies have indicated the presence of potential  
67 confounds (e.g. regression to the mean; Artus, van der Windt, Jordan, & Hay, 2010; Hrobjartsson,  
68 Kaptchuk, & Miller, 2011) that led to overestimation of very small to null placebo effects  
69 (Hrobjartsson & Gotzsche, 2001, 2004, 2010; Hrobjartsson et al., 2011). Notwithstanding  
70 considerable individual variability in the magnitude of placebo analgesia (Wager, Atlas, Leotti, &  
71 Rilling, 2011), several studies indicate that placebo analgesia is a reliable and consistent  
72 phenomenon (Atlas & Wager, 2014; Finniss, Kaptchuk, Miller, & Benedetti, 2010; Price et al., 1999;  
73 Vase et al., 2015). Interestingly, clinical trials for analgesics and experimental studies of placebo  
74 pose a methodological contrast. While clinical trials for analgesics routinely compare them against a  
75 placebo to estimate the magnitude of the analgesic effect, most experimental studies of placebo  
76 analgesia do not use a real analgesic treatment to estimate the size of the placebo effect (e.g. Price et  
77 al., 1999, but see Vase, Robinson, Verne, & Price, 2005 for an exception). Here we address this  
78 methodological difference by directly comparing the magnitude of placebo analgesia against that of  
79 a known analgesic.

80 Laser thermal stimulation provides a targeted way to selectively stimulate nociceptive free  
81 nerve endings in the skin. In particular, solid state lasers (as the one used in the current study) offers

82 a reduced risk of superficial burns than the CO<sub>2</sub> laser, due to its shorter wavelength (1.34 μm). In  
83 addition, solid state lasers allow a better afferent-volley synchronization which results in enhanced  
84 amplitudes and shorter latencies of cortical responses (Perchet et al., 2008). To date, recording of  
85 electroencephalographic activity during laser thermal stimulation (Laser Evoked Potentials, LEP)  
86 provides the most reliable and selective neurophysiological method of assessing the function of  
87 nociceptive pathways (Garcia-Larrea, 2012). However, there is still relatively little research using  
88 laser thermal stimulation to study placebo analgesia.

89

90 Using LEP, here we aimed to provide a robust estimation of placebo analgesia by contrasting  
91 the effect of pain relief expectation from an inert cream (vaseline) against a real topical analgesic  
92 agent (lidocaine) and their respective control conditions in a large sample of healthy volunteers  
93 (n=40). We collected pain reports and EEG responses triggered by laser nociceptive stimulation in a  
94 double-blind randomized within-subject design whereby healthy volunteers underwent a standard  
95 placebo induction script of verbal suggestions in a sham medical setting meant to enhance the  
96 expectation on treatment outcome. Verbal induction of expectations about the outcome can not only  
97 lead to formation of conscious expectations, but also bring online effects of unconscious learning,  
98 two processes that can lead to placebo analgesia (e.g. Benedetti et al., 2003; Pecina, Stohler, &  
99 Zubieta, 2014).

100

## 101 **2. Material and Methods**

### 102 **2.1 Subjects**

103 EEG data were collected from 40 healthy volunteers. We excluded one participant from data  
104 analysis as she questioned about covert experimental aims possibly concerning the investigation of  
105 placebo in the debriefing phase. The remaining 39 participants (21 females) were aged 24.9±4.5  
106 (mean±SD). All had normal or corrected-to-normal vision and were naïve as to the purpose of the

107 experiment. None of the participants had a history of neurological or psychiatric illnesses or  
108 conditions that could potentially interfere with pain sensitivity (e.g. drug intake or skin diseases).  
109 Participants gave written informed consent and were debriefed about the actual aim of the study at  
110 the end of the experiment. The participants could therefore decide to withdraw their consent about  
111 data usage if they wished so. All experimental procedures were approved by the Fondazione Santa  
112 Lucia ethics committee and were in accordance with the standards of the Declaration of Helsinki.  
113 No participant had short or medium term symptoms (e.g. Inflammation) associated with the  
114 compounds used in this study.

115

## 116 ***2.2 Nociceptive stimulation***

117 Radiant-heat stimuli were generated by an infrared neodymium yttrium aluminium perovskite  
118 (Nd:YAP) laser with a wavelength of 1.34  $\mu\text{m}$  (Electronical Engineering, ElEn, Florence, Italy).  
119 Laser pulses selectively and directly activate the A $\delta$  and C-fiber nociceptive terminals located in the  
120 superficial layers of the skin (Cruccu et al., 2003). Laser pulses were directed at the dorsum of both  
121 left and right hand and foot, on a squared area (5x5 cm) defined prior to the beginning of the  
122 experimental session and highlighted using a He-Ne guide laser. The laser pulse (3 ms duration)  
123 was transmitted via an optic fibre and its diameter was set at approximately 5 mm (28 mm<sup>2</sup>) by  
124 focusing lenses. After each stimulus, the laser beam target was shifted by approximately 1 cm in a  
125 random direction, to avoid nociceptor fatigue or sensitization.

126 Before the recording session, a familiarization and calibration procedure was carried out to check  
127 the quality of the sensation associated with radiant heat stimuli. In this procedure, the energy of the  
128 laser stimulus was individually adjusted using the method of limits (laser step size: 0.25 J),  
129 separately for each of the four stimulated territories (left hand, right hand, left foot, right foot).  
130 During this procedure subjects were asked to report the quality and the intensity of the sensation  
131 elicited by each laser pulse using a numerical rating scale (NRS, ranging from 0=no sensation, to

132 8=unbearable pain). The energy of laser stimulation needed to achieve a rating of 6 (corresponding  
133 to ‘moderate pain’) was chosen as experimental energy value. We checked that this value  
134 corresponded to a rating of about 60 on visual analogue scale (VAS) ranging from 0 (not painful) to  
135 100 (extremely painful). Once nociceptive intensity was calibrated, participants underwent a brief  
136 familiarization block of 10 stimuli. Importantly, there was no difference in the average energy used  
137 to obtain a moderate sensation of pain for both feet and hands: right and left hand,  $2.27\pm 0.34$  J;  
138 right and left foot,  $2.33\pm 0.32$  J. According to the parameters mentioned above, laser pulses elicited a  
139 clear pinprick/burning brief sensation of acute pain related to the activation of A $\delta$  and C fibres.

140

### 141 **2.3 EEG recording**

142 The electroencephalogram (EEG) was recorded using 54 tin scalp electrodes placed according to  
143 the International 10-20 system, referenced against the nose and grounded at AFz.  
144 Electro-oculographic (EOG) signals were simultaneously recorded using surface electrodes.  
145 Electrode impedance was kept below 5 K $\Omega$ . The EEG signal was amplified and digitized at a  
146 sampling rate of 1,000 Hz.

147

### 148 **2.4 Experimental design**

149 Upon arrival participants were welcomed in a temperature-controlled room by two experimenters  
150 (EV, BC) dressed in white coats. They introduced the participants to the study using the same set of  
151 sentences (see Appendix), and informed them about the whole procedure. In brief, participants were  
152 told that two analgesics (named *Varicaine* and *Exacaine*) were being evaluated for their efficacy. In  
153 reality, one of these was an inert cream (vaseline, labelled as cream A and called *Varicaine*), while  
154 the other was a topical analgesic (5% lidocaine, labelled as cream B and called *Exacaine*).

155 Participants then underwent the EEG cap montage. The analgesic cream was applied on the  
156 dorsal surface of one of four limbs (hand/foot, coded as Treat B). An identical site in the

157 contralateral limb was used as its control (no cream, control site, coded as Ctrl B). Same procedure  
158 was adopted for the inert cream on the other pair of limbs (coded as Treat A and Ctrl A respectively).  
159 The conditions were counterbalanced in a double-blind fashion across participants (Fig. 1).

160  
161  
162  
163  
164  
165  
166  
167

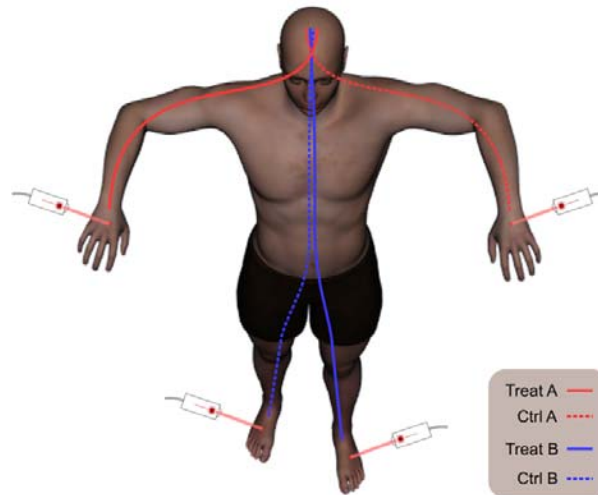

168 **Fig 1.** Participants were told that two analgesics were being evaluated for their efficacy. They were unaware that  
169 one of these was an inert cream (vaseline, labelled as cream A and called Varicaine), while the other was an  
170 actual topical analgesic (lidocaine, labelled as cream B and called Exacaine). Subjective pain thresholds for  
171 moderate pain (a rating of 6 out of 10) was established for each participant before the application of creams. The  
172 analgesic cream was applied on the dorsal surface of one of four limbs (hand/foot, coded here as Treat B). An  
173 identical site in the contralateral limb was used as its control (no cream, control site, coded here as Ctrl B). The  
174 same procedure was adopted for the inert cream on the other pair of limbs (coded here as Treat A and Ctrl A  
175 respectively). The conditions were counterbalanced in a double-blind fashion across participants. Each block  
176 lasted between 10 and 15 min, and an interval of 5 min separated the two blocks. In each block we delivered 30  
177 laser pulses, using an inter-stimulus interval ranging between 5 and 15 s. At the end of each train of 10 stimuli,  
178 participants were asked to rate the intensity of the painful sensation elicited by the laser stimuli using a visual  
179 analogue scale ranging from 0 (not painful) to 100 (extremely painful).  
180

181 Creams were spread and left acting on the skin for a mean duration of 13:52 min (SD=2.52 min).  
182 After careful rubbing of the creams off the administration sites, all four limbs were stimulated using  
183 a Nd:YAP laser at an energy level corresponding to subjective threshold for moderate pain (i.e.  
184 NRS=6). Participants were asked to focus their attention on the painful stimuli while closing their  
185 eyes and relax their muscles. Laser-evoked EEG responses were obtained following the stimulation  
186 of the dorsum of the right and left hand and foot in four separate blocks, on the same day. Each  
187 block lasted between 10 and 15 min, and an interval of 5 min separated the two blocks. In each  
188 block we delivered 30 laser pulses, using an inter-stimulus interval (ISI) ranging between 5 and 15s.

189 At the end of each train of 10 stimuli, participants were asked to rate the pain intensity and  
190 unpleasantness of the painful sensation elicited by the laser stimuli using a visual analogue scale  
191 (VAS) ranging from 0 (no sensation, no unpleasant at all) to 100 (intolerable intensity/intolerable  
192 unpleasantness).

193 At the end of the experiment, participants went through a structured debriefing interview in  
194 which we asked their opinion on the experimental aims (e.g. "What do you think was the study  
195 objective?" and "Did you notice any difference in the efficacy of the two creams?") and were  
196 debriefed regarding the deception.

197

## 198 ***2.5 Data analysis***

### 199 ***2.5.1 General statistical approach***

200 Dependent variables were analyzed with repeated-measures Analysis of Variance (ANOVA) with  
201 factors 'expectation' (treatment, no treatment) and treatment 'label' (A – placebo, B – analgesic).  
202 Further, we run an additional ANOVA only on placebo responders, i.e. individuals who reported  
203 significant lower pain unpleasantness during placebo vs. no treatment (n= 30). The choice of pain  
204 unpleasantness as the variable of interest was supported by the evidence that the major feature of  
205 the multidimensional pain experience is its affective quality rather than its intensity (Merskey,  
206 Bogduk, & Pain, 1994).

207 Statistical analyses were performed using Statistica<sup>®</sup> 8.0 (StatSoft Inc., Tulsa, Oklahoma,  
208 USA). Variability is reported as standard error of mean (SEM) unless reported otherwise. The level  
209 of significance was set at  $p < 0.05$ . We reported Cohen's d and partial eta squared ( $p\eta^2$ ) as measures  
210 of effect size. Tukey HSD tests were used to perform post-hoc pairwise comparisons.

211

### 212 ***2.5.2 Laser evoked potentials***

213 EEG data were processed with EEGLAB (v.12; Delorme & Makeig, 2004 and Letswave 5,



214 <http://nocions.webnode.com/>). Single participant data were merged in a unique experimental  
215 session file and down-sampled to 250 Hz. Sinusoidal artifacts (50-100 Hz) were then removed  
216 using CleanLine, an EEGLAB plugin which enabled us to selectively delete power line frequency  
217 contribution from the recorded signal (<http://www.nitrc.org/projects/cleanline>). Further, signal was  
218 DC removed and band-pass filtered from 1 to 30 Hz (filter order: 4). Data were then segmented into  
219 epochs using a time window ranging from 1 s before to 2 s after the stimulus (total epoch duration:  
220 3 s) and baseline corrected using the mean of the entire epoch (Groppe, Urbach, & Kutas, 2011).  
221 Epoched data were merged and further processed using independent component analysis (ICA;  
222 Vigário, 1997) to subtract EOG and muscle-related artifacts, aided by the semi-automatic approach  
223 offered by Adjust (Mognon, Jovicich, Bruzzone, & Buiatti, 2011), an EEGLAB plugin which  
224 identifies artifactual independent components using an automatic algorithm that combines  
225 stereotyped artifact-specific spatial and temporal features. After ICA and an additional baseline  
226 correction (-500 to 0 ms), we re-referenced data to a common average reference (Lehmann &  
227 Skrandies, 1980) and segmented in four average waveforms time-locked to the stimulus onset, one  
228 for each experimental condition (Ctrl A; Treat A; Ctrl B; Treat B). Single-subject average  
229 waveforms were subsequently averaged to obtain group-level average waveforms. Group-level  
230 scalp topographies were computed by spline interpolation. Scalp topographies were plotted at the  
231 peak latency of the N2 and P2 LEP waves, measured at the vertex (Cz electrode). The N2 wave was  
232 defined as the most negative deflection after stimulus onset. The P2 wave was defined as the most  
233 positive deflection after stimulus onset. We used group-level median peak values to identify the  
234 temporal window to extract the minimum (N2, 180-280 ms) and the maximum (P2, 280-480 ms)  
235 amplitudes for each participant. These two waves seem to result from sources in bilateral  
236 operculo-insular and anterior cingulate cortices (Garcia-Larrea, Frot, & Valeriani, 2003). They are  
237 significantly modulated by both top-down and bottom-up attentional factors (reviewed in Legrain et  
238 al., 2012).

239

### 240 **2.5.3 Correlation between pain ratings and N2-P2 amplitudes**

241 Placebo and analgesia response magnitude was calculated as a ratio of the average ratings, N2-P2  
 242 peak-to-peak amplitude, for the placebo control limb divided by that for the placebo treatment limb  
 243 (Ctrl/Treat). In other words, the greater the value of this ratio the greater the analgesic effect.

244

## 245 **3 Results**

### 246 **3.1 Psychophysics**

247 All participants described the sensation elicited by the laser stimuli as clearly painful and pricking.  
 248 The average ratings (mean±SD) of the pain unpleasantness for each experimental condition as well  
 249 as the effect sizes are reported in Table 1.

250

251 **Table 1.** Mean (±SD) of pain ratings (unpleasantness)(top) in the full sample. Cohen's *d* as for both  
 252 types of ratings as well as for the ratio Ctrl/Treat (bottom). A refers to the inert cream, and B refers  
 253 to the real analgesic. Ctrl A refers to the no-treatment contralateral limb control for the inert cream;  
 254 Ctrl B refers to the no-treatment contralateral limb control for the real analgesic.

255

|                        | <b>Pain rating (unpleasantness)</b> |                       |                                      |                   |
|------------------------|-------------------------------------|-----------------------|--------------------------------------|-------------------|
|                        | Treat A                             | Ctrl A                | Treat B                              | Ctrl B            |
| <b>RATINGS</b>         | 62.27<br>(±18.14)                   | 70.27<br>(±15.76)     | 56.81<br>(±17.73)                    | 60.94<br>(±18.13) |
|                        | <b>Pain rating (unpleasantness)</b> |                       |                                      |                   |
|                        | Treat A<br>vs. Ctrl<br>A            | Treat B<br>vs. Ctrl B | Ctrl A/Treat A vs.<br>Ctrl B/Treat B |                   |
| <b>EFFECT<br/>SIZE</b> | -0.51                               | -0.21                 | -0.07                                |                   |

256

257

### 258 **3.1.2 Effects of expectation and treatment label**

259 The ANOVA performed on the unpleasantness ratings revealed main effects of both 'expectation'  
 260 ( $F_{38}=19.62$ ;  $P<0.001$ ;  $\eta^2=0.34$ ) and treatment 'label' ( $F_{38}=6.70$ ;  $P=0.01$ ;  $\eta^2=0.15$ ), but no  
 261 significant interaction between the two factors ( $F_{38}=2.21$ ;  $P=0.14$ ;  $\eta^2=0.05$ ). This pattern of results

262 indicates that participants felt less pain unpleasantness when expecting treatment compared to no  
263 treatment and felt less pain unpleasantness during the analgesic-related (Ctrl B and Treat B) vs.  
264 placebo-related (Ctrl A and Treat A) stimulation (Fig. 2, A). The analysis on responders (Fig. 2, B)  
265 revealed no main effect of this ‘label’, suggesting that individuals responding better to the placebo  
266 treatment had no different unpleasantness depending on the type of cream used and its related  
267 control stimulation ( $F_{29}=2.40$ ;  $P=0.13$ ;  $\eta^2=0.08$ ) but rather showed lower pain unpleasantness  
268 when treatment was expected ( $F_{29}=36.80$ ;  $P<0.001$ ;  $\eta^2=0.56$ ) and with both ‘expectation’ and  
269 ‘treatment label’ ( $F_{29}=7.83$ ;  $P=0.009$ ;  $\eta^2=0.21$ ). These interactions reflect (i) a larger reduction of  
270 pain unpleasantness in responders when expecting the Treat A (i.e. *Varicaine*) compared to Ctrl A  
271 (58.56 vs. 71.21;  $P<0.001$ ), (ii) a greater pain unpleasantness in responders during the Ctrl A against  
272 Treat B and Ctrl B (71.21 vs. 57.51 and 61.71;  $P_s<0.001$ ).

273

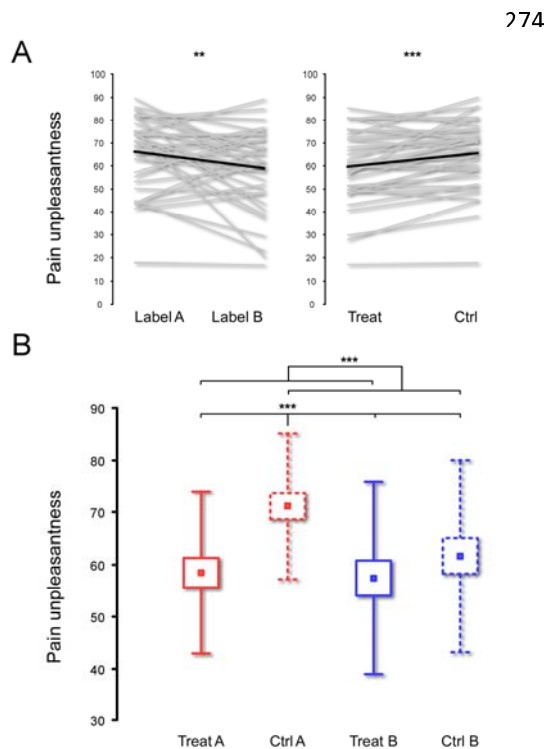

**Fig 2.** Panel A shows single subject average ratings of pain unpleasantness for the two levels (Label A, Label B) of factor treatment “label” (left) and the two levels (Treat, Ctrl) of the factor treatment “expectation” (right). Grand-average is shown with bold black line. Individuals reported lower pain unpleasantness during both placebo and analgesia treatment than in the respective control conditions ( $***p<0.001$ ). They also reported lower pain unpleasantness during both actual analgesia and its control condition than during placebo and its control condition ( $***p<0.001$ ). Panel B shows results only for placebo responders. Box-plots show (mean  $\pm$ SE $\pm$ SD) of pain intensity ratings. The pattern observed in the full sample was enhanced in this subgroup ( $***p<0.01$ ).

298

299

300

### 301 3.2 Laser evoked potentials

302 Fig. 3 (A) displays the grand average waveforms and global field power (GFP) of LEPs.  
303 Nociceptive stimuli delivered in the four conditions elicited maximal N2 and P2 waves at the  
304 electrode Cz with topographies maximally expressed over the scalp vertex (Fig. 3, A, top).  
305

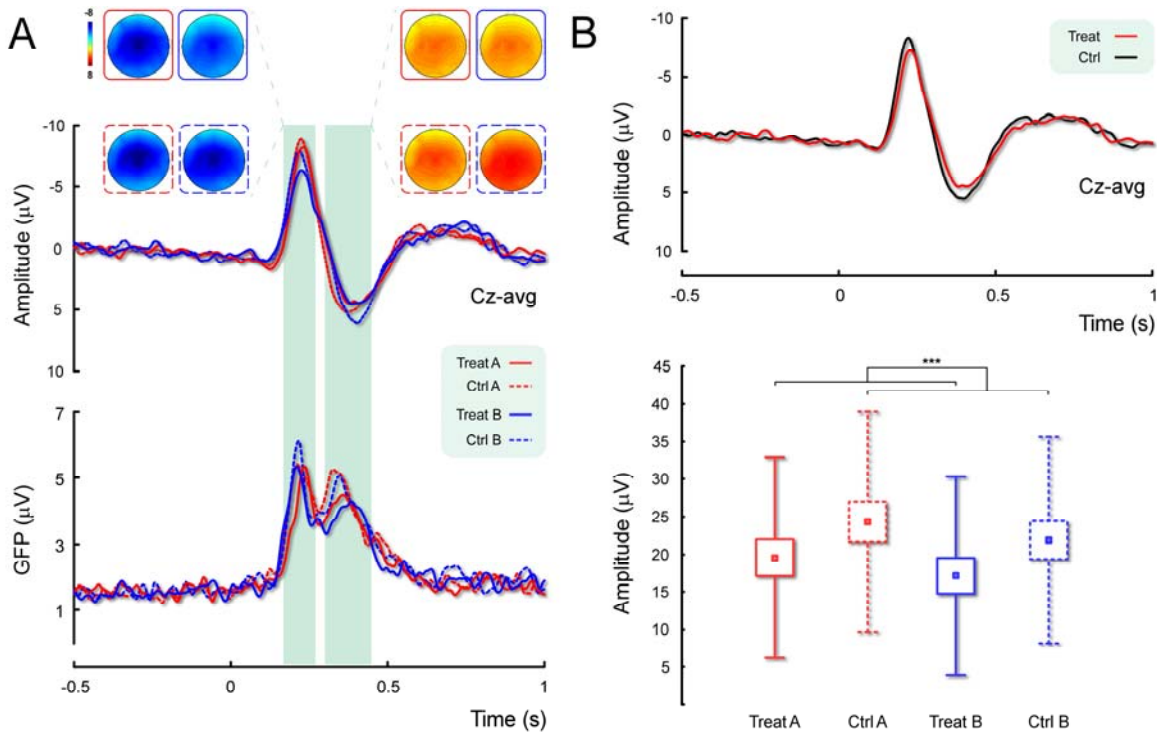

306

307 **Fig 3.** Panel A shows group-level average LEPs and scalp topographies of peak amplitudes (top) within the N2  
308 and P2 latency range (180-280 and 280-480 ms post-stimulus respectively) as well as global field power (GFP;  
309 bottom) in the four conditions (Placebo-related in red, analgesia-related in blue; treatment in solid and control  
310 conditions in dashed lines). Note the greater amplitudes elicited by the stimulation of the no-treatment (control)  
311 limbs. Panel B clarifies this pattern by showing the main effect of treatment expectation on the vertex LEPs in the  
312 full sample (top). Box-plots (mean  $\pm$ SE $\pm$ SD) show N2-P2 peak-to-peak amplitude in placebo responders in the  
313 four conditions (bottom). Note the amplitude reduction in Treat A and B compared to Ctrl A and Ctrl B  
314 respectively.  
315

#### 316 3.2.1 Effects of expectation and treatment label on N2-P2

317 The ANOVA performed on the peak-to-peak amplitude of the main vertex potentials N2-P2  
318 extracted at the Cz electrode revealed a main effect of 'expectation' ( $F_{38}=11.54$ ;  $P=0.002$ ;  $\eta^2=0.23$ )  
319 but no effect of treatment 'label' ( $F_{38}=0.69$ ;  $P=0.41$ ;  $\eta^2=0.02$ ) or interaction between the two

320 factors ( $F_{38}=0.98$ ;  $P=0.33$ ;  $\eta^2=0.02$ ). This pattern of results indicates that participants displayed  
321 lower vertex potentials amplitude when expecting treatment compared to no treatment (Fig. 3, B).  
322 Peak-to-peak amplitudes in responders (Fig. 3, B, bottom) revealed no main effect of treatment  
323 ‘label’, suggesting that individuals responding better to the placebo treatment had no different  
324 N2-P2 LEP amplitude depending on the type of cream used and its related control stimulation  
325 ( $F_{29}=0.79$ ;  $P=0.38$ ;  $\eta^2=0.03$ ) but rather showed lower N2-P2 amplitude when treatment was  
326 expected ( $F_{29}=24.26$ ;  $P<0.001$ ;  $\eta^2=0.45$ ). However, there was no interaction between the two  
327 factors ( $F_{29}<0.001$ ;  $P=0.99$ ;  $\eta^2<0.001$ ).

328

### 329 **3.3 Correlation of pain ratings with LEPs**

330 The magnitude of the placebo response was calculated as the ratio of unpleasantness ratings of the  
331 control limb divided by that of the treatment limb (Fig. 4). This magnitude was positively correlated  
332 with the N2-P2 response, calculated similarly (i.e. N2-P2 response of the control limb divided by  
333 that of the treatment limb) ( $r_{38}=0.50$ ;  $P=0.001$ ).

334

335

336

337

338

339

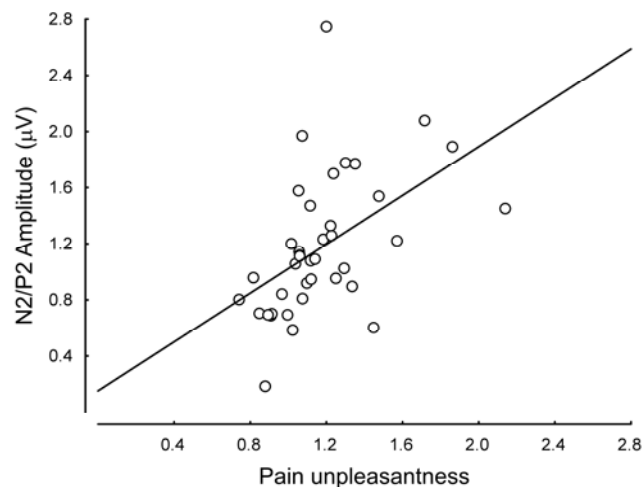

340

341

342

343 **Fig 4.** Scatterplot representing the relationship between ratings of pain unpleasantness (x-axis) and the amplitude  
344 of the N2/P2 LEPs (y-axis) with its linear fit. Both measures were calculated as a ratio of the control limb divided  
345 by treatment limb, thus providing an index of the placebo effect. Note that the reduction of pain unpleasantness  
346 associated with placebo is linked to a decrease of N2/P2 peak-to-peak amplitude.

347

348

#### 349 **4 Discussion**

350 In this study, we estimated the magnitude of placebo analgesia against a real analgesic, using  
351 self-report and laser-evoked potential measures. Our results show that healthy volunteers felt less  
352 pain and displayed lower magnitude of EEG responses when receiving a purported analgesic  
353 treatment (regardless of whether this was a sham or actual analgesic compound) compared to the  
354 stimulation of non-treated skin territory (Figs 2 and 3). Magnitude of the placebo response  
355 computed from pain unpleasantness ratings was positively correlated with that computed from the  
356 neural response to placebo (Fig. 4). This study presents one of the few concordant behavioural and  
357 neural estimates of the placebo analgesia effect, using a true analgesic and a sham treatment and  
358 expand current knowledge about placebo analgesia and its neural correlates (Geuter, Koban, &  
359 Wager, 2017; Wager & Atlas, 2015 for reviews). Despite the high number of placebo responders  
360 ( $n=30$  according to our identification criterion), the true effect size for the placebo effect was small  
361 (Table 1,  $d=-0.07$ ). This is consistent with previous research (Price, Finniss, & Benedetti, 2008).  
362 Across all participants, our data demonstrate a small difference between placebo and analgesia  
363 treatment in self-reported pain unpleasantness (Fig. 2). This difference is in the expected direction  
364 and is explained by greater analgesia after the administration of the real analgesic (lidocaine) than  
365 the placebo treatment (vaseline). Interestingly within placebo responders, the treatment effect size  
366 (i.e. treatment vs. control) was larger for placebo than lidocaine for pain unpleasantness ( $d=-0.53$  vs.  
367  $-0.21$ ). This unexpected pattern may have been driven by the greater pain unpleasantness rating in  
368 the placebo control condition, compared to the analgesic control condition (Fig. 2 B). This  
369 difference is unlikely to be explained by response bias and social desirability (Hrobjartsson et al.,  
370 2011), as participants were on the assumption that both creams were analgesics.

371 The current design allows us to parse the magnitude of placebo analgesia by not only comparing the  
372 inert cream against an actual analgesic but also accounting for the variability associated with the  
373 stimulation of mirror body territories which were not treated with the inert cream or actual analgesic

374 (Fig. 1), in a sample (n=39) larger than the majority of similar previous studies. Our results indicate  
375 a small non-significant difference between placebo and the actual analgesic condition as reflected  
376 by ratings of pain unpleasantness of pain (Fig. 2). Interestingly, the control conditions revealed a  
377 trend similar to the treatment conditions (namely analgesia lower than placebo). This was accounted  
378 for by greater pain unpleasantness during the placebo-control condition compared to all the other  
379 conditions (Fig. 2 B). The N2-P2 LEPs confirmed that the most important factor explaining  
380 variability of these neural responses was the expectation of being treated with an analgesic cream,  
381 regardless of whether this cream was a real analgesic or just vaseline (Fig. 4).

382 These findings provide further evidence in support of the response expectancy theory (Kirsch,  
383 1997; Koyama, McHaffie, Laurienti, & Coghill, 2005; Montgomery & Kirsch, 1997). Akin to other  
384 studies we provided our volunteers with positive expectation about the treatment and did not  
385 implement a conditioning procedure (De Pascalis, Chiaradia, & Carotenuto, 2002; Paul Enck,  
386 Bingel, Schedlowski, & Rief, 2013; Pollo et al., 2001). On the contrary, we implemented a  
387 well-established script of verbal suggestion within a ritual context (see appendix) that led the  
388 majority of healthy volunteers to believe in the experience of a reduction of pain following  
389 administration of an inert cream, particularly a decrease in the affective component of their  
390 sensation. Interestingly, we observed a greater difference between placebo treatment and control  
391 (namely, a greater reduction of pain) than between analgesic treatment and control (Table 1).  
392 Individuals who showed a greater self-reported placebo effect as measured with the pain  
393 unpleasantness ratings also demonstrated a greater modulation of the N2-P2 amplitude for placebo  
394 treatment (Fig. 4). This robust positive relationship between the behavioral and the neural marker  
395 provides an index of convergent validity for the reported results.

396 An alternative interpretation of the current results can also be based on a “nocebo” effect  
397 associated with the control (i.e. no treatment) conditions. Such an interpretation would suggest that



398 individuals who experienced a lower placebo effect had greater negative expectation from the pain  
399 stimulation on the control limb, and this correlated with the extent of the N2-P2 modulation. Other  
400 authors have similarly speculated that the placebo and nocebo conditions may be used by  
401 experimental volunteers as reference perceptual criterion against which compare the sensations  
402 experienced during the “neutral” control condition (Freeman et al., 2015). Future studies may  
403 address not only the role of implicit and explicit positive expectations in triggering and maintaining  
404 placebo analgesia but also the role of co-occurring implicit contextual negative expectations that  
405 may arise from the stimulation of non-treated body parts. This observation leads us to two important  
406 caveats. First, the significance of these findings, and more generally of those obtained in the context  
407 of laboratory experiments on healthy volunteers, should not be generalized to the understanding of  
408 placebo responses in pain patients. In fact, a lack of correlation between placebo analgesia in  
409 experimental pain and clinical pain has been reported (Muller et al., 2016). Second, the  
410 interpretation of placebo effects is context-dependent and importantly relies on individuals’  
411 interpretation of the treatment context (Enck & Klosterhalfen, 2013; Whalley, Hyland, & Kirsch,  
412 2008). Consequently, different experimental designs can affect participant’s interpretation to a  
413 different extent and contribute to differences in the magnitude of the placebo effect.

414 Notwithstanding these caveats, our experimental design allowed us to precisely test the size of  
415 the placebo effect by calibrating it against a true analgesic. The experimental design allowed a  
416 head-to-head comparison between the analgesic and the placebo, due to the presence of both a real  
417 analgesic compound and of a non-treated skin territory on a body area exactly contralateral to the  
418 experimentally treated one. Unfortunately however, this design does not allow us to examine the  
419 earliest response to nociceptive stimuli, as measured through the N1 component (Valentini et al.,  
420 2012) as upper and lower limbs are associated with different arrival time in the somatosensory  
421 cortices, and thus with different latencies of the evoked brain signals. Hence we focused on the  
422 magnitude of the N2 and P2 potentials for the current study. It is noteworthy that the majority of



423 previous studies report a reduction of the N2 and P2 potentials during placebo analgesia (Colloca et  
424 al., 2008; Martini, Lee, Valentini, & Iannetti, 2015; Wager, Matre, & Casey, 2006; Watson,  
425 El-Deredy, Vogt, & Jones, 2007).

426 In conclusion, our findings provide an ecologically valid estimate of the placebo analgesia  
427 effect by comparing a placebo treatment directly against that of a real analgesic. We show that  
428 verbal suggestions alone are sufficient to establish a moderate placebo effect and that  
429 unpleasantness of pain is the most sensitive measure of the placebo analgesia. We also show that the  
430 EEG measures of placebo analgesia are strongly correlated with the magnitude of the placebo  
431 analgesia computed from pain unpleasantness ratings. Future studies should examine individual  
432 differences in the behavioural and neural measures of placebo analgesia.

433

434

435

436

437

438 **Appendix**

439 *Induction script*

440 "Thanks for coming. You are volunteering for the final phase of a clinical evaluation of two new  
441 analgesics, *Exacaine* and *Varicaine* (these are the commercial labels and the active component  
442 cannot be disclosed). The active components are completely harmless and have no side effects in  
443 humans. You will participate in a study in which we will be testing the efficacy of a new analgesic  
444 technique on the experience of pain and on brain activity. During the experiment we will deliver  
445 thermal (laser) stimuli which can induce pricking and hot sensations. These sensations may be  
446 interpreted as painful depending on your very personal estimate. Importantly, we will use only one  
447 stimulus energy during the experiment, which will correspond to what you will judge as a moderate  
448 sensation of pain. We will spread one cream on one limb and the other cream on another limb. It  
449 will take about 10 minutes to come into action. Afterwards we will rub it off from your skin and  
450 start with the stimulation protocol".

451

452 **Acknowledgments**

453 We thank Prof. Simon Baron-Cohen, Dr. Karthik Bhargavan, Dr Giuseppina Porciello, Ms Assunta  
454 Ruggiero, Dr. Li Hu, for their help and encouragement at various stages of this project. E Valentini  
455 and SM. Aglioti were supported by Italian Ministry of University and Research (PRIN, Progetti di  
456 Ricerca di Rilevante Interesse Nazionale, 2015, Prot. 20159CZFJK). B Chakrabarti was supported  
457 by a British Council Researcher Exchange grant.

458

459

460

## 461 **References**

- 462 Artus, M., van der Windt, D. A., Jordan, K. P., & Hay, E. M. (2010). Low back pain symptoms  
463 show a similar pattern of improvement following a wide range of primary care treatments: a  
464 systematic review of randomized clinical trials. *Rheumatology (Oxford)*, *49*(12), 2346–2356.  
465 <https://doi.org/10.1093/rheumatology/keq245>
- 466 Atlas, L. Y., & Wager, T. D. (2014). A meta-analysis of brain mechanisms of placebo analgesia:  
467 consistent findings and unanswered questions. *Handb Exp Pharmacol*, *225*, 37–69.  
468 [https://doi.org/10.1007/978-3-662-44519-8\\_3](https://doi.org/10.1007/978-3-662-44519-8_3)
- 469 Benedetti, F. (2008). Mechanisms of placebo and placebo-related effects across diseases and  
470 treatments. *Annu Rev Pharmacol Toxicol*, *48*, 33–60.  
471 <https://doi.org/10.1146/annurev.pharmtox.48.113006.094711>
- 472 Benedetti, F., Pollo, A., Lopiano, L., Lanotte, M., Vighetti, S., & Rainero, I. (2003). Conscious  
473 expectation and unconscious conditioning in analgesic, motor, and hormonal placebo/nocebo  
474 responses. *Journal of Neuroscience*, *23*(10), 4315–4323. Retrieved from  
475 <http://www.ncbi.nlm.nih.gov/pubmed/12764120>
- 476 Colloca, L., Tinazzi, M., Recchia, S., Le Pera, D., Fiaschi, A., Benedetti, F., & Valeriani, M. (2008).  
477 Learning potentiates neurophysiological and behavioral placebo analgesic responses. *Pain*,  
478 *139*(2), 306–314. <https://doi.org/10.1016/j.pain.2008.04.021>
- 479 Cruccu, G., Pennisi, E., Truini, A., Iannetti, G. D., Romaniello, A., Le Pera, D., ... Valeriani, M.  
480 (2003). Unmyelinated trigeminal pathways as assessed by laser stimuli in humans. *Brain*,  
481 *126*(Pt 10), 2246–2256. <https://doi.org/10.1093/brain/awg227>
- 482 De Pascalis, V., Chiaradia, C., & Carotenuto, E. (2002). The contribution of suggestibility and  
483 expectation to placebo analgesia phenomenon in an experimental setting. *Pain*, *96*(3), 393–402.  
484 [https://doi.org/10.1016/S0304-3959\(01\)00485-7](https://doi.org/10.1016/S0304-3959(01)00485-7)
- 485 Delorme, A., & Makeig, S. (2004). EEGLAB: an open source toolbox for analysis of single-trial  
486 EEG dynamics including independent component analysis. *Journal of Neuroscience Methods*,  
487 *134*(1), 9–21. Retrieved from  
488 [http://www.ncbi.nlm.nih.gov/entrez/query.fcgi?cmd=Retrieve&db=PubMed&dopt=Citation&li](http://www.ncbi.nlm.nih.gov/entrez/query.fcgi?cmd=Retrieve&db=PubMed&dopt=Citation&list_uids=15102499)  
489 [st\\_uids=15102499](http://www.ncbi.nlm.nih.gov/entrez/query.fcgi?cmd=Retrieve&db=PubMed&dopt=Citation&list_uids=15102499)
- 490 Enck, P., Bingel, U., Schedlowski, M., & Rief, W. (2013). The placebo response in medicine:  
491 Minimize, maximize or personalize? *Nature Reviews Drug Discovery*.  
492 <https://doi.org/10.1038/nrd3923>
- 493 Enck, P., & Klosterhalfen, S. (2013). The placebo response in clinical trials-the current state of play.  
494 *Complement Ther Med*, *21*(2), 98–101. <https://doi.org/10.1016/j.ctim.2012.12.010>
- 495 Finnis, D. G., Kaptchuk, T. J., Miller, F., & Benedetti, F. (2010). Biological, clinical, and ethical  
496 advances of placebo effects. *Lancet*, *375*(9715), 686–695.  
497 [https://doi.org/10.1016/S0140-6736\(09\)61706-2](https://doi.org/10.1016/S0140-6736(09)61706-2)
- 498 Freeman, S., Yu, R., Egorova, N., Chen, X., Kirsch, I., Claggett, B., ... Kong, J. (2015). Distinct

- 499 neural representations of placebo and nocebo effects. *Neuroimage*, 112, 197–207.  
500 <https://doi.org/10.1016/j.neuroimage.2015.03.015>
- 501 Garcia-Larrea, L. (2012). Objective pain diagnostics: clinical neurophysiology. *Neurophysiol Clin*,  
502 42(4), 187–197. <https://doi.org/10.1016/j.neucli.2012.03.001>
- 503 Garcia-Larrea, L., Frot, M., & Valeriani, M. (2003). Brain generators of laser-evoked potentials:  
504 from dipoles to functional significance. *Neurophysiologie Clinique*, 33(6), 279–292. Retrieved  
505 from  
506 [http://www.ncbi.nlm.nih.gov/entrez/query.fcgi?cmd=Retrieve&db=PubMed&dopt=Citation&li](http://www.ncbi.nlm.nih.gov/entrez/query.fcgi?cmd=Retrieve&db=PubMed&dopt=Citation&list_uids=14678842)  
507 [st\\_uids=14678842](http://www.ncbi.nlm.nih.gov/entrez/query.fcgi?cmd=Retrieve&db=PubMed&dopt=Citation&list_uids=14678842)
- 508 Geuter, S., Koban, L., & Wager, T. D. (2017). The Cognitive Neuroscience of Placebo Effects:  
509 Concepts, Predictions, and Physiology. *Annu Rev Neurosci*, 40, 167–188.  
510 <https://doi.org/10.1146/annurev-neuro-072116-031132>
- 511 Groppe, D. M., Urbach, T. P., & Kutas, M. (2011). Mass univariate analysis of event-related brain  
512 potentials/fields I: A critical tutorial review. *Psychophysiology*, 48(12), 1711–1725.  
513 <https://doi.org/10.1111/j.1469-8986.2011.01273.x>
- 514 Hrobjartsson, A., & Gotzsche, P. C. (2001). Is the placebo powerless? An analysis of clinical trials  
515 comparing placebo with no treatment. *N Engl J Med*, 344(21), 1594–1602.  
516 <https://doi.org/10.1056/NEJM200105243442106>
- 517 Hrobjartsson, A., & Gotzsche, P. C. (2004). Is the placebo powerless? Update of a systematic  
518 review with 52 new randomized trials comparing placebo with no treatment. *J Intern Med*,  
519 256(2), 91–100. <https://doi.org/10.1111/j.1365-2796.2004.01355.x>
- 520 Hrobjartsson, A., & Gotzsche, P. C. (2010). Placebo interventions for all clinical conditions.  
521 *Cochrane Database Syst Rev*, (1), CD003974.  
522 <https://doi.org/10.1002/14651858.CD003974.pub3>
- 523 Hrobjartsson, A., Kaptchuk, T. J., & Miller, F. G. (2011). Placebo effect studies are susceptible to  
524 response bias and to other types of biases. *J Clin Epidemiol*, 64(11), 1223–1229.  
525 <https://doi.org/10.1016/j.jclinepi.2011.01.008>
- 526 Kirsch, I. (1997). Response expectancy theory and application: A decennial review. *Applied and*  
527 *Preventive Psychology*, 6(2), 69–79. [https://doi.org/10.1016/S0962-1849\(05\)80012-5](https://doi.org/10.1016/S0962-1849(05)80012-5)
- 528 Koyama, T., McHaffie, J. G., Laurienti, P. J., & Coghill, R. C. (2005). The subjective experience of  
529 pain: Where expectations become reality. *Proceedings of the National Academy of Sciences*,  
530 102(36), 12950–12955. <https://doi.org/10.1073/pnas.0408576102>
- 531 Legrain, V., Mancini, F., Sambo, C. F. F., Torta, D. M. M., Ronga, I., & Valentini, E. Cognitive  
532 aspects of nociception and pain. Bridging neurophysiology with cognitive psychology, 42  
533 *Neurophysiologie Clinique* § (2012). <https://doi.org/10.1016/j.neucli.2012.06.003>
- 534 Lehmann, D., & Skrandies, W. (1980). Reference-free identification of components of  
535 checkerboard-evoked multichannel potential fields. *Electroencephalography and Clinical*  
536 *Neurophysiology*, 48(6), 609–621. [https://doi.org/10.1016/0013-4694\(80\)90419-8](https://doi.org/10.1016/0013-4694(80)90419-8)
- 537 Levine, J. D., Gordon, N. C., & Fields, H. L. (1978). THE MECHANISM OF PLACEBO

- 538 ANALGESIA. *The Lancet*, 312(8091), 654–657.  
539 [https://doi.org/10.1016/S0140-6736\(78\)92762-9](https://doi.org/10.1016/S0140-6736(78)92762-9)
- 540 Martini, M., Lee, M. C. H., Valentini, E., & Iannetti, G. D. (2015). Intracortical modulation, and not  
541 spinal inhibition, mediates placebo analgesia. *European Journal of Neuroscience*, 41(4).  
542 <https://doi.org/10.1111/ejn.12807>
- 543 Merskey, H., Bogduk, N., & Pain, I. A. for the S. of. (1994). *Classification of Chronic Pain:  
544 Descriptions of Chronic Pain Syndromes and Definitions of Pain Terms* (2nd ed.). Seattle, WA.
- 545 Mognon, A., Jovicich, J., Bruzzone, L., & Buiatti, M. (2011). ADJUST: An automatic EEG artifact  
546 detector based on the joint use of spatial and temporal features. *Psychophysiology*, 48(2),  
547 229–240. <https://doi.org/10.1111/j.1469-8986.2010.01061.x>
- 548 Montgomery, G. H., & Kirsch, I. (1997). Classical conditioning and the placebo effect. *Pain*,  
549 72(1–2), 107–113. Retrieved from <http://www.ncbi.nlm.nih.gov/pubmed/9272794>
- 550 Muller, M., Kamping, S., Benrath, J., Skowronek, H., Schmitz, J., Klinger, R., & Flor, H. (2016).  
551 Treatment history and placebo responses to experimental and clinical pain in chronic pain  
552 patients. *Eur J Pain*, 20(9), 1530–1541. <https://doi.org/10.1002/ejp.877>
- 553 Pecina, M., Stohler, C. S., & Zubieta, J. K. (2014). Neurobiology of placebo effects: expectations or  
554 learning? *Soc Cogn Affect Neurosci*, 9(7), 1013–1021. <https://doi.org/10.1093/scan/nst079>
- 555 Perchet, C., Godinho, F., Mazza, S., Frot, M., Legrain, V., Magnin, M., & Garcia-Larrea, L. (2008).  
556 Evoked potentials to nociceptive stimuli delivered by CO<sub>2</sub> or Nd:YAP lasers. *Clin  
557 Neurophysiol*, 119(11), 2615–2622. <https://doi.org/10.1016/j.clinph.2008.06.021>
- 558 Pollo, A., Amanzio, M., Arslanian, A., Casadio, C., Maggi, G., & Benedetti, F. (2001). Response  
559 expectancies in placebo analgesia and their clinical relevance. *Pain*, 93(1), 77–84.  
560 [https://doi.org/10.1016/S0304-3959\(01\)00296-2](https://doi.org/10.1016/S0304-3959(01)00296-2)
- 561 Price, D. D., Finniss, D. G., & Benedetti, F. (2008). A comprehensive review of the placebo effect:  
562 recent advances and current thought. *Annu Rev Psychol*, 59, 565–590.  
563 <https://doi.org/10.1146/annurev.psych.59.113006.095941>
- 564 Price, D. D., Milling, L. S., Kirsch, I., Duff, A., Montgomery, G. H., & Nicholls, S. S. (1999). An  
565 analysis of factors that contribute to the magnitude of placebo analgesia in an experimental  
566 paradigm. *Pain*, 83(2), 147–156. Retrieved from  
567 <http://www.ncbi.nlm.nih.gov/pubmed/10534585>
- 568 Tuttle, A. H., Tohyama, S., Ramsay, T., Kimmelman, J., Schweinhardt, P., Bennett, G. J., & Mogil, J.  
569 S. (2015). Increasing placebo responses over time in U.S. clinical trials of neuropathic pain.  
570 *Pain*, 156(12), 2616–2626. <https://doi.org/10.1097/j.pain.0000000000000333>
- 571 Valentini, E., Hu, L., Chakrabarti, B., Hu, Y., Aglioti, S. M., & Iannetti, G. D. (2012). The primary  
572 somatosensory cortex largely contributes to the early part of the cortical response elicited by  
573 nociceptive stimuli. *NeuroImage*, 59(2). <https://doi.org/10.1016/j.neuroimage.2011.08.069>
- 574 Vase, L., Robinson, M. E., Verne, G. N., & Price, D. D. (2005). Increased placebo analgesia over  
575 time in irritable bowel syndrome (IBS) patients is associated with desire and expectation but  
576 not endogenous opioid mechanisms. *Pain*, 115(3), 338–347.

- 577 <https://doi.org/10.1016/j.pain.2005.03.014>
- 578 Vase, L., Vollert, J., Finnerup, N. B., Miao, X., Atkinson, G., Marshall, S., ... Segerdahl, M. (2015).  
579 Predictors of the placebo analgesia response in randomized controlled trials of chronic pain: a  
580 meta-analysis of the individual data from nine industrially sponsored trials. *Pain*, *156*(9),  
581 1795–1802. <https://doi.org/10.1097/j.pain.0000000000000217>
- 582 Vigário, R. N. (1997). Extraction of ocular artefacts from EEG using independent component  
583 analysis. *Electroencephalography and Clinical Neurophysiology*, *103*(3), 395–404.  
584 [https://doi.org/10.1016/S0013-4694\(97\)00042-8](https://doi.org/10.1016/S0013-4694(97)00042-8)
- 585 Wager, T. D., & Atlas, L. Y. (2015). The neuroscience of placebo effects: connecting context,  
586 learning and health. *Nat Rev Neurosci*, *16*(7), 403–418. <https://doi.org/10.1038/nrn3976>
- 587 Wager, T. D., Atlas, L. Y., Leotti, L. A., & Rilling, J. K. (2011). Predicting Individual Differences in  
588 Placebo Analgesia: Contributions of Brain Activity during Anticipation and Pain Experience.  
589 *Journal of Neuroscience*, *31*(2), 439–452. <https://doi.org/10.1523/JNEUROSCI.3420-10.2011>
- 590 Wager, T. D., Matre, D., & Casey, K. L. (2006). Placebo effects in laser-evoked pain potentials.  
591 *Brain Behav Immun*, *20*(3), 219–230. <https://doi.org/10.1016/j.bbi.2006.01.007>
- 592 Watson, A., El-Deredy, W., Vogt, B. A., & Jones, A. K. (2007). Placebo analgesia is not due to  
593 compliance or habituation: EEG and behavioural evidence. *Neuroreport*, *18*(8), 771–775.  
594 <https://doi.org/10.1097/WNR.0b013e3280c1e2a8>
- 595 Whalley, B., Hyland, M. E., & Kirsch, I. (2008). Consistency of the placebo effect. *J Psychosom*  
596 *Res*, *64*(5), 537–541. <https://doi.org/10.1016/j.jpsychores.2007.11.007>
- 597
